# Supplementary material for: Targeting sinonasal undifferentiated carcinoma with a combinatory immunotherapy approach
Source: PubMed Central journal article supplement — Transl Oncol. 2024 Apr 10;44:101943. doi: 10.1016/j.tranon.2024.101943 (PMC11024348; doi:10.1016/j.tranon.2024.101943), 2024-04-10
Supplement: mmc1.pdf [file mmc1.pdf]

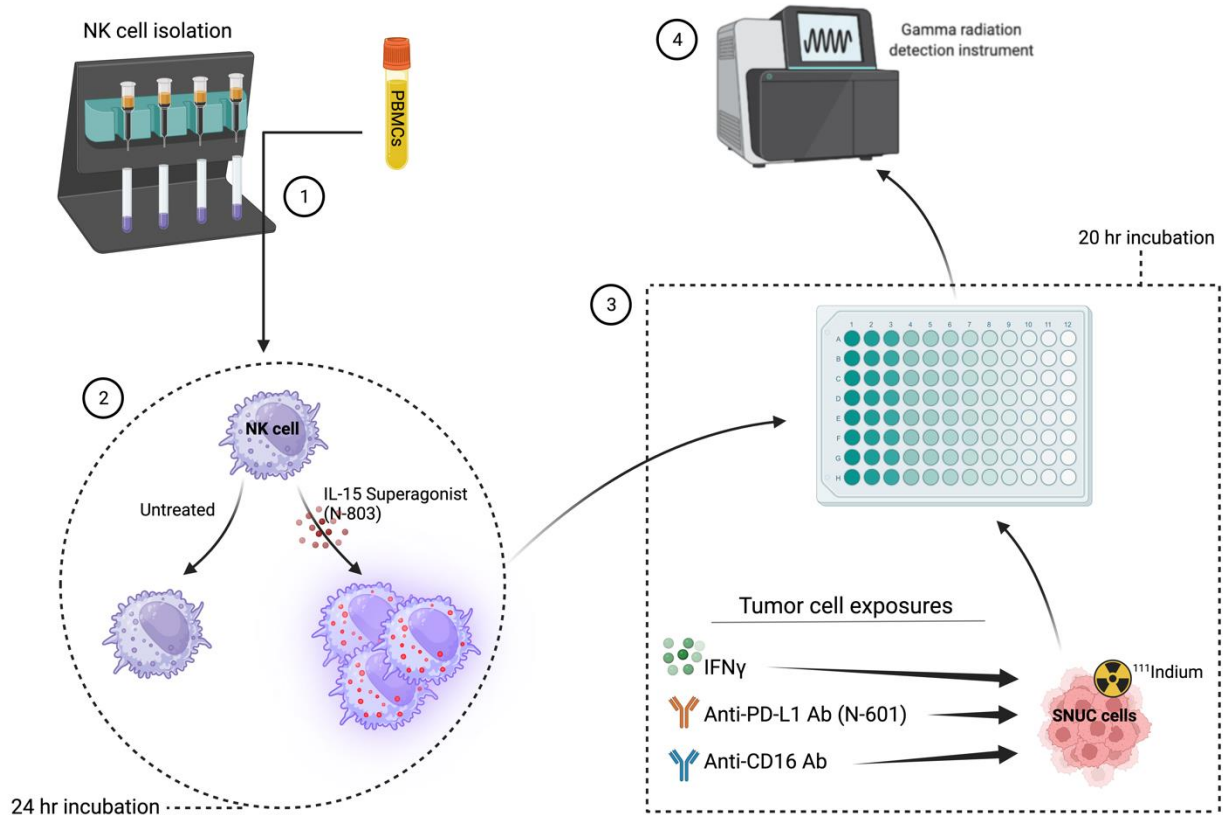

**Supplementary Figure 1.** Experimental workflow for Indium-111 NK cell cytotoxicity assay. **1.** NK cells were isolated from healthy donor PBMCs using a magnetic negative selection kit, further detailed in Materials and Methods. **2.** Freshly isolated NK cells (effector cells) are left untreated or incubated with IL-15 superagonist for 24 hours. **3.** SNUC tumor cells (target cells) labeled with Indium-111 are then incubated in various treatment conditions, depending on the experiment. Treatment conditions include IFN $\gamma$ , anti-PD-L1 antibody, and/or anti-CD16 antibody. Target cells are then plated with NK cells at an E:T ratio of 10:1. **4.** Following 20 hours of assay incubation, experimental supernatants are harvested and gamma radiation release is measured as a surrogate for target cell lysis. Image made using BioRender.

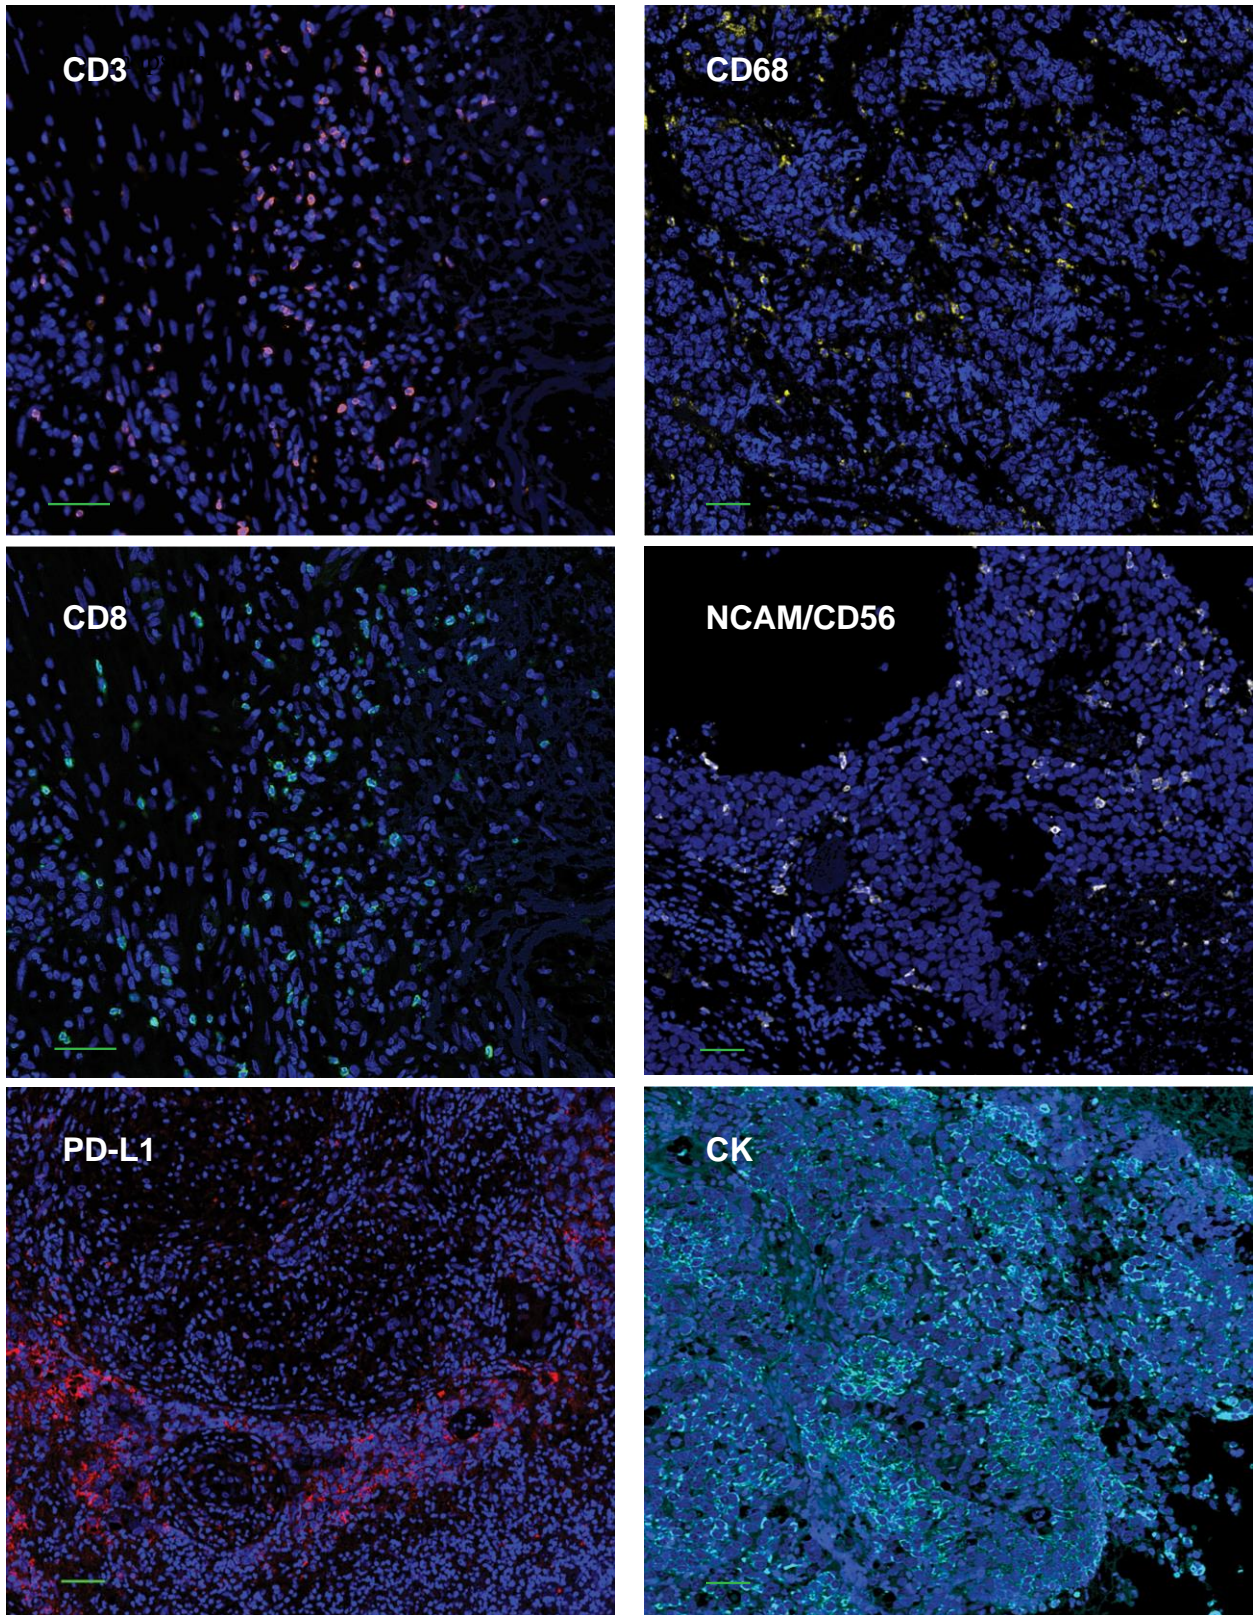

**Supplementary Figure 2.** A representative image for each marker. The scale bars indicate 50 μm.

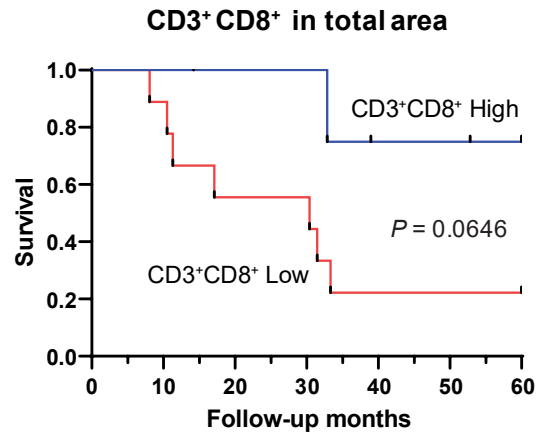

**Supplementary Figure 3.** Patients with high CD3<sup>+</sup>CD8<sup>+</sup> in total tissue area show a non-statistically significant improvement in 5-year overall survival rate ( $P = 0.065$ ).

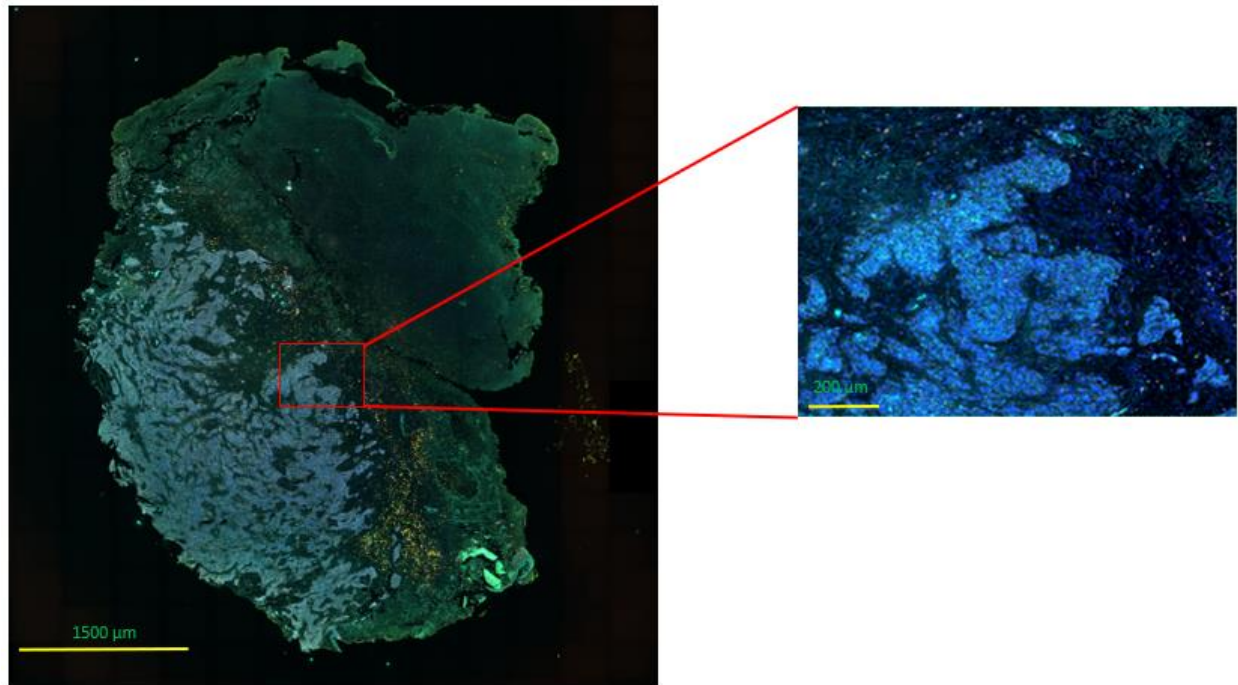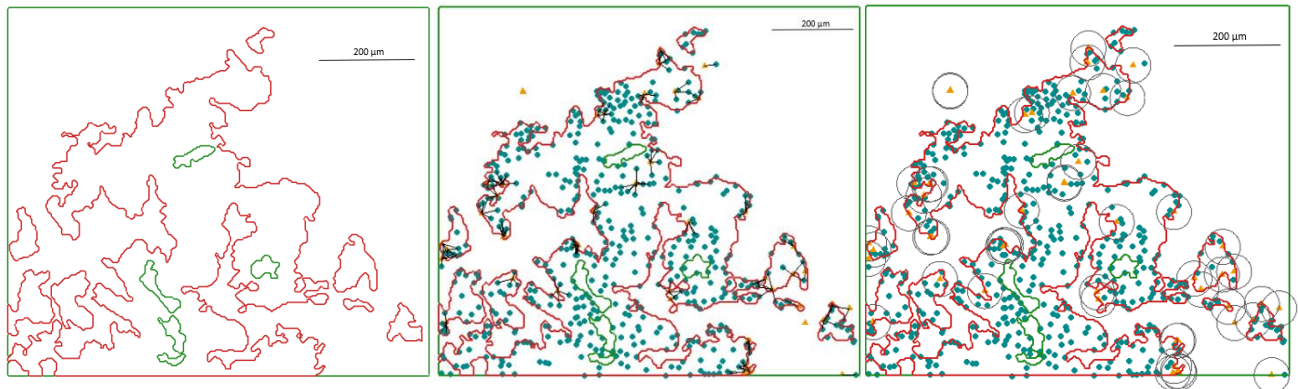

**Supplementary Figure 4.** An example of SNUC neighborhood analysis. The upper left panel demonstrates a SNUC tumor section with zoom magnification in the upper right. The lower panel demonstrates segmentation with red indicating tumor region of interest with green indicating stroma region of interest including the surrounding area. Blue circles indicate CK- tumor cells while yellow triangles indicate CD56+ cells. Black lines represent CD56+ neighbors <math><50\mu\text{m}</math> and black circles indicate radius of

Supplementary Table 1. Patient demographics and clinical characteristics

| Sample ID | Age | Sex    | Race           | Primary tumor site | T stage | Lymph node metastasis | Distant metastasis | Clinical stage | Carcinogen exposure                         | Smoking history | Alcohol use | Vital status | Disease-related death | Recurrence | Response to IC | Regimens                  |
|-----------|-----|--------|----------------|--------------------|---------|-----------------------|--------------------|----------------|---------------------------------------------|-----------------|-------------|--------------|-----------------------|------------|----------------|---------------------------|
| SNUC1     | 63  | Male   | White          | Maxillary sinus    | T4b     | N1                    | M1                 | IVc            | No                                          | Former          | Unknown     | Deceased     | N/A                   | Unknown    | N/A            | N/A                       |
| SNUC10    | 80  | Female | White          | Nasal cavity       | T4b     | N2C                   | M0                 | IVb            | No                                          | Never           | Never       | Deceased     | N/A                   | No         | N/A            | N/A                       |
| SNUC13    | 83  | Male   | White          | Nasal cavity       | T4a     | N0                    | M0                 | IVa            | No                                          | Former          | Never       | Alive        | No                    | No         | No             | Cisplatin, etoposide      |
| SNUC15    | 25  | Male   | Latin American | Nasal cavity       | T4b     | N0                    | M0                 | IVb            | Radiation                                   | Never           | Current     | Alive        | No                    | No         | Yes            | Cisplatin, etoposide      |
| SNUC16    | 74  | Male   | White          | Nasal Cavity       | T4b     | N0                    | M0                 | IVb            | No                                          | Former          | Never       | Deceased     | N/A                   | Yes        | Yes            | Cisplatin, etoposide      |
| SNUC18    | 74  | Female | White          | Maxillary sinus    | T4a     | N0                    | M0                 | IVa            | No                                          | Never           | Former      | Deceased     | Yes                   | Yes        | No             | Carboplatin, etoposide    |
| SNUC20    | 52  | Male   | White          | Ethmoid sinus      | T4a     | N0                    | M0                 | IVa            | Lead                                        | Never           | Former      | Alive        | No                    | No         | Yes            | Cisplatin, etoposide      |
| SNUC22    | 62  | Male   | White          | Ethmoid sinus      | T4a     | N0                    | M0                 | IVa            | No                                          | Never           | Never       | Alive        | No                    | Yes        | Yes            | Cisplatin, etoposide      |
| SNUC23    | 35  | Male   | Black          | Ethmoid sinus      | T4a     | N0                    | M0                 | IVa            | No                                          | Former          | Current     | Deceased     | Yes                   | Yes        | Yes            | Cisplatin, etoposide      |
| SNUC27    | 61  | Male   | Asian          | Maxillary sinus    | T4b     | N0                    | M0                 | IVb            | chlorinated compounds, dust, vinyl chloride | Former          | Former      | Alive        | No                    | No         | Yes            | 5-FU, cisplatin, taxotere |
| SNUC29    | 65  | Female | White          | Frontal sinus      | T4a     | N0                    | M0                 | IVa            | No                                          | Never           | Never       | Deceased     | N/A                   | Yes        | No             | Carboplatin, etoposide    |
| SNUC32    | 74  | Female | White          | Nasal cavity       | T4a     | N0                    | M0                 | IVa            | No                                          | Former          | Current     | Deceased     | Yes                   | Yes        | No             | Carboplatin, etoposide    |
| SNUC33    | 51  | Female | Asian          | Ethmoid sinus      | T4a     | N0                    | M0                 | IVa            | No                                          | Never           | Never       | Deceased     | No                    | Yes        | Yes            | Cisplatin, etoposide      |
| SNUC34    | 43  | Male   | White          | Ethmoid sinus      | T4b     | N0                    | M0                 | IVb            | No                                          | Never           | Current     | Alive        | No                    | No         | Yes            | Cisplatin, etoposide      |

IC: induction chemotherapy

**Supplementary Table 2.** SNUC multi-spectral immunofluorescence panel

| Antibody  | Vendor/Clone                           | Catalog #  | Dilution | Order of Staining | Opal | Opal Dilution            |
|-----------|----------------------------------------|------------|----------|-------------------|------|--------------------------|
| CD3e      | Bethyl Laboratories/BL-298-5D12        | A700-016   | 1:150    |                   | 1    | 620 1:100                |
| CD8a      | Bethyl Laboratories/BLR044F            | A700-044   | 1:250    |                   | 2    | 520 1:100                |
| PD-L1     | Bethyl Laboratories/BLR020E            | A700-020   | 1:250    |                   | 3    | 690 1:100                |
| CD68      | Bethyl Laboratories/KP-1               | A500-018A  | 1:250    |                   | 4    | 570 1:100                |
| CK        | Invitrogen Thermo Fisher Scientific/80 | 01-672-060 | 1:50     |                   | 5    | 480 1:100                |
| NCAM/CK56 | Bethyl Laboratories/BLR152J            | A700-152   | 1:100    |                   | 6    | 780 1:100, TSA-DIG 1:100 |

**Supplementary Table 3.** Interaction analysis in CKhigh tumor cells

| Marker 1 | ROI 1  | Marker 2 | ROI 2  | Group         | Wilcox | Mean_NI  | SD_NI    |
|----------|--------|----------|--------|---------------|--------|----------|----------|
| CK+      | Stroma | CD56+    | Stroma | Recurrence    | 0.871  | 12.43723 | 12.9055  |
|          |        |          |        | No Recurrence |        | 9.760302 | 10.04758 |
| CK+      | Stroma | CD56+    | Tumor  | Recurrence    | 0.417  | 2.014741 | 2.47381  |
|          |        |          |        | No Recurrence |        | 3.570823 | 3.53775  |
| CK+      | Tumor  | CD56+    | Stroma | Recurrence    | 0.745  | 5.982825 | 11.06346 |
|          |        |          |        | No Recurrence |        | 4.425049 | 4.621642 |
| CK+      | Tumor  | CD56+    | Tumor  | Recurrence    | 0.371  | 1.697655 | 2.536259 |
|          |        |          |        | No Recurrence |        | 4.958313 | 5.667206 |

ROI: Region of interest  
 NI: Number of interactions  
 Mean NI: mm<sup>2</sup>
